# Supplementary material for: The emerging plasma biomarker Dickkopf-3 (DKK3) and its association with renal and cardiovascular disease in the general population
Source: PubMed Central journal article supplement (PMC8060267; doi:10.1038/s41598-021-88107-9), 2021-04-21
Supplement: 41598_2021_88107_MOESM1_ESM.pdf [file 41598_2021_88107_MOESM1_ESM.pdf]

## **SUPPLEMENTANTARY FIGURE**

To the manuscript entitled:

### **The emerging plasma biomarker Dickkopf-3 (DKK3) and its association with renal and cardiovascular disease in the general population**

Arnold Piek<sup>1</sup>, Leonie Smit<sup>1</sup>, Navin Suthahar<sup>1</sup>, Stephan J.L. Bakker<sup>2</sup>, Rudolf A. de Boer<sup>1</sup>,  
Herman H.W. Silljé<sup>1</sup>

<sup>1</sup> Department of Cardiology, University Medical Center Groningen, University of Groningen,  
The Netherlands

<sup>2</sup> Department of Internal Medicine, University Medical Center Groningen, University of  
Groningen, The Netherlands

\*Corresponding author:

H.H.W. Silljé, PhD

Department of Cardiology, University Medical Center Groningen

University of Groningen

Hanzeplein 1, 9713 GZ Groningen, The Netherlands

P.O. Box 30.001, 9700 RB Groningen, The Netherlands

Phone: +31 50 361 5523, fax: +31 50 3611347, email: [h.h.w.sillje@umcg.nl](mailto:h.h.w.sillje@umcg.nl)

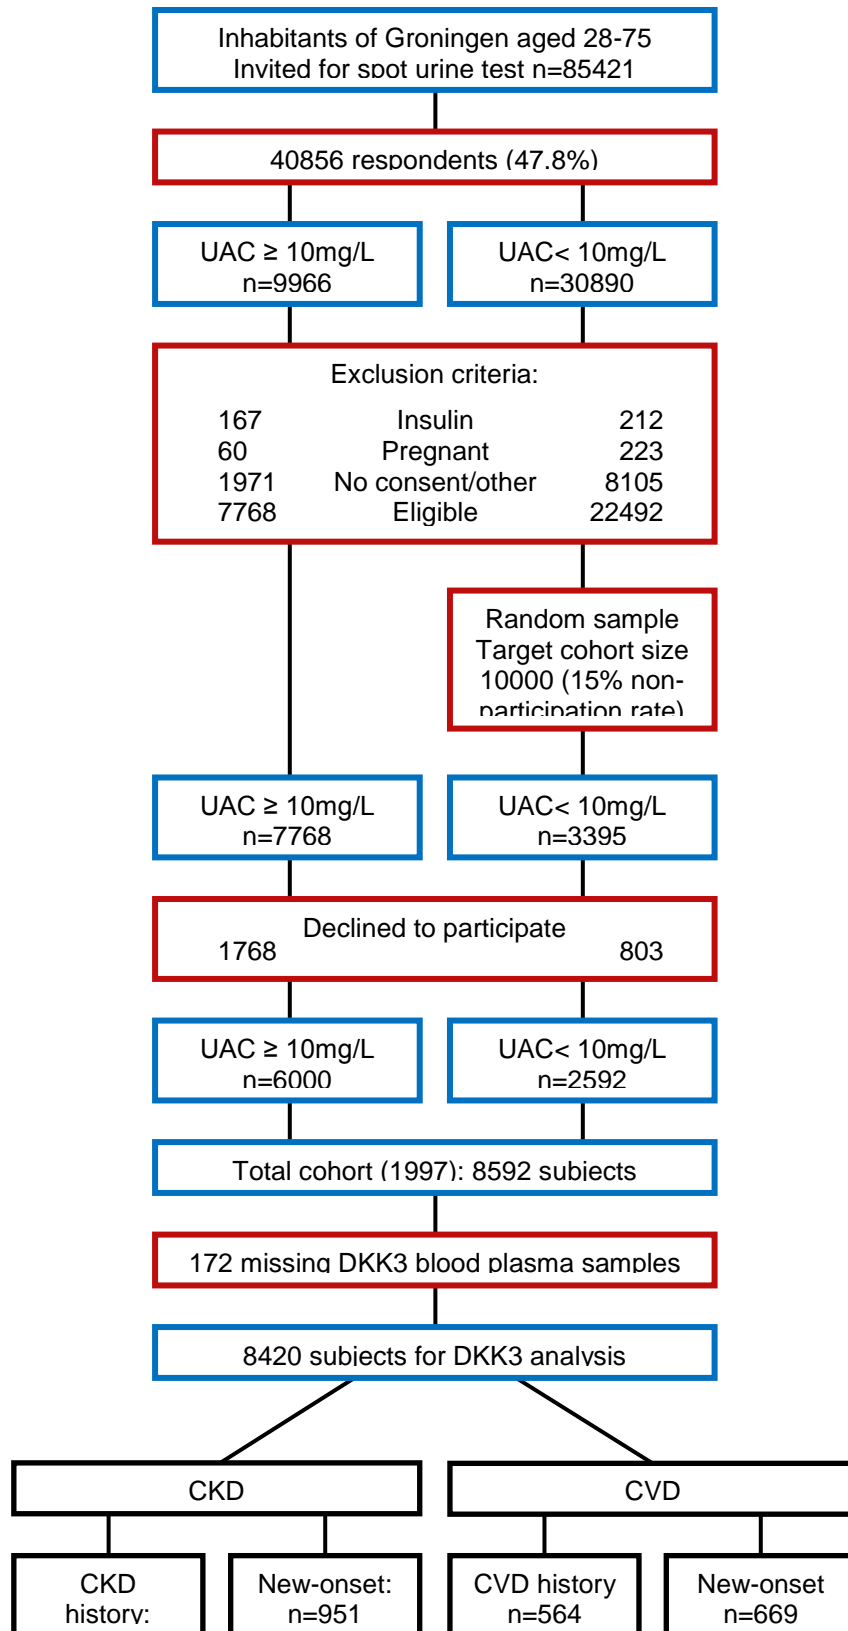

**Supplementary Figure 1. Schematic depiction of the study subject selection procedure.**

A total of 85421 subjects aged 28-75 years were invited to participate in this cohort study. A

response was received from a total of 40856 subjects. Of these, 9966 subjects had a morning urinary albumin concentration (UAC) > 10 mg/L and 30890 an UAE < 10 mg/L. Exclusion criteria were insulin usage, current pregnancy or no consent. A random sample was drawn from the subpopulation with an UAC < 10 mg/L. Hereafter, a small group of subjects declined to participate. The final cohort consisted of 8592 subjects, of which 6000 had an UAC > 10 mg/L and 2592 an UAC < 10 mg/L. A total of 172 plasma samples were unavailable for baseline Dickkopf-3 (DKK3) plasma measurement, thus 8420 subjects DKK3 plasma concentrations were measured. At baseline, 1361 subjects had a history of chronic kidney disease (CKD) and 564 had a history of cardiovascular disease (CVD). During follow-up, new-onset CKD was observed in 951 subjects and new-onset CVD in 669 subjects.
